# Supplementary material
Source: publisher figshare collection journal article supplement (https://geolsoc.figshare.com/ndownloader/files/20021282)
Supplement: Supplementary file 1 [file 20021282]

## Sheet: Item1
Item 1: Analytical Methods.

## Sheet: Item2
Item 2: Results of zircon U-Pb age determinations by SHRIMP.
					TOTAL								RADIOGENIC			AGE
Sample/Grain	U (ppm)	Th (ppm)	Th/U		206Pb* (ppm)	204Pb/206Pb	f206 (%)	238U/206Pb	±1σ	207Pb/206Pb	±1σ		206Pb/238U	±1σ		Age (Ma)	±1σ
ANG01	Lithic lapilli tuff; 6,247,327N - 347,187E
1.1	118.514	51.1813	0.43186		0.695501	0.00073992	0.223976	146.391	2.46948	0.048666	0.00303633		0.00681571	0.000118066		43.7879	0.755953
2.1	170.653	112.148	0.657172		0.973325	N.D.	0.729515	150.626	2.29637	0.0526388	0.00239194		0.00659054	0.00010275		42.346	0.658034
3.1	280.167	171.724	0.612936		1.61622	0.000486108	0.355048	148.923	1.97673	0.0496877	0.00166554		0.00669105	9.00769e-05		42.9896	0.576814
4.1	222.556	90.8082	0.408025		1.29578	0.000558777	0.848218	147.554	2.06908	0.0535948	0.00196649		0.00671971	9.60974e-05		43.1731	0.615349
5.1	115.628	50.0543	0.432892		0.678274	N.D.	0.374369	146.454	2.50921	0.0498547	0.00274179		0.00680253	0.000119097		43.7035	0.762559
6.1	120.647	79.8346	0.661722		0.706898	0.00177399	1.29198	146.623	2.62871	0.0571088	0.00304563		0.00673209	0.000124149		43.2524	0.794963
7.1	243.324	168.319	0.691748		1.40496	0.000217611	0.38975	148.787	2.16907	0.0499628	0.00204096		0.00669482	9.92865e-05		43.0137	0.635786
8.1	110.187	88.483	0.803022		0.656834	0.000556132	0.997181	144.119	2.65658	0.0547931	0.00311819		0.00686953	0.000129981		44.1324	0.832193
9.1	200.257	101.461	0.506655		1.15271	0.000588811	0.273019	149.249	2.26985	0.0490373	0.0021757		0.00668192	0.000103413		42.9312	0.662218
10.1	335.054	285.78	0.852937		1.94424	0.000617048	0.476109	148.05	1.99106	0.0506499	0.00176137		0.00672233	9.18351e-05		43.1899	0.588054
11.1	137.241	109.44	0.797425		0.786092	0.00212105	0.48885	149.988	2.57239	0.0507396	0.00266761		0.00663462	0.000116181		42.6283	0.744016
12.1	321.933	132.921	0.412884		1.82869	0.000668953	0.429034	151.241	2.05009	0.0502597	0.00175094		0.00658362	9.05985e-05		42.3016	0.580215
13.1	195.889	94.0273	0.480004		1.13278	4.61967e-05	0.284347	148.562	2.28055	0.0491307	0.00223592		0.00671208	0.000104916		43.1243	0.671821
14.1	256.514	230.761	0.899604		1.512	0.00038195	0.25802	145.748	2.07392	0.048939	0.00191467		0.00684344	9.89155e-05		43.9654	0.633317
15.1	102.087	74.5244	0.730006		0.583876	0.000887323	1.29879	150.209	2.85262	0.0571419	0.00338717		0.00657093	0.000128599		42.2204	0.823594
16.1	203.041	114.422	0.563538		1.14117	0.000817055	0.895645	152.855	2.53411	0.0539399	0.00227761		0.00648357	0.000109488		41.6609	0.701259
18.1	30.0422	16.4365	0.547113		0.170473	0.00685427	1.01861	151.398	4.87252	0.0549201	0.00616401		0.00653783	0.000217		42.0084	1.38978
19.1	272.271	232.077	0.852377		1.55364	0.000904484	0.772107	150.554	2.11172	0.0529759	0.00191901		0.00659084	9.41594e-05		42.3479	0.603016
20.1	223.315	135.324	0.605978		1.51582	0.0077068	13.1426	126.565	1.83318	0.150934	0.00823271		0.00686265	0.000184159		44.0884	1.17907
Notes:
*Uncertainties given at 1σ level.
*Error in FC1 reference zircon calibration was 0.49% for the analytical session (not included in above errors but required when comparing data from different mounts).
*f206 % denotes the percentage of 206Pb that is common Pb.
*Correction for common Pb made using the measured 238U/206Pb and 207Pb/206Pb ratios following Tera and Wasserburg (1972) as outlined in Williams (1998).
*N.D.: no data.
*References cited:
Compston, W., Williams, I.S., Kirschvink, J.L., Zhang Zichao, and MaGougan, 1992. Zircon U-Pb dates for the Early Cambrian time-scale: Journal of the Geological Society [London], v. 149, p. 171–184.
Tera, F. and Wasserburg, G.J., 1972. U-Th-Pb systematics in three Apollo 14 basalts and the problem of initial Pb in lunar rocks: Earth and Planetary Science Letters, v. 14, p. 281–304.

## Sheet: Item3
Item 3: Results of zircon U-Pb age determinations by LA-ICP-MS.
								CORRECTED RATIOS										CORRECTED AGES (Ma)
Sample/Grain	U (ppm)	Th (ppm)	Th/U		207Pb/206Pb	±2σ	207Pb/235U	±2σ	206Pb/238U	±2σ	208Pb/232Th	±2σ	Rho		206Pb/238U	±2σ	207Pb/235U	±2σ	207Pb/206Pb	±2σ	Best age (Ma)	±2σ		Disc %	Obs1
CR018	Rhyiolite; 6,275,132N - 348,432E
Zircon_161	434	324	0.746544		0.0859	0.0086	0.0812	0.0068	0.00672	0.0003	0.00281	0.00017	-0.023772		43.2	2	79.1	6.4	1270	220	43.2	2		45.3856	*
Zircon_162	1426	1455	1.02034		0.0477	0.0035	0.0438	0.0028	0.00657	0.00017	0.002151	9.3e-05	-0.11548		42.2	1.1	43.5	2.7	120	150	42.2	1.1		2.98851
Zircon_163	519	378	0.728324		0.0541	0.006	0.0473	0.0054	0.00635	0.00024	0.00225	0.00016	0.32754		40.8	1.5	46.8	5.2	320	240	40.8	1.5		12.8205
Zircon_164	314	186	0.592357		0.0538	0.0072	0.0461	0.0051	0.0065	0.00025	0.00223	0.00024	0.062206		41.8	1.6	45.7	5	250	270	41.8	1.6		8.53392
Zircon_165	1013	675	0.666338		0.0538	0.0043	0.0483	0.0042	0.00654	0.00015	0.0023	0.00011	0.47729		42.04	0.96	47.9	4.1	320	170	42.04	0.96		12.2338
Zircon_166	870	693	0.796552		0.0485	0.0034	0.0428	0.0028	0.00644	0.00013	0.002105	9e-05	-0.037268		41.41	0.82	42.9	2.6	140	130	41.41	0.82		3.47319
Zircon_167	345	239	0.692754		0.0528	0.0054	0.0462	0.0049	0.00633	0.00025	0.00207	0.00015	0.26612		40.7	1.6	45.8	4.7	300	220	40.7	1.6		11.1354
Zircon_168	647	511	0.789799		0.0481	0.0034	0.0437	0.0032	0.00649	0.00015	0.00208	0.00012	0.12379		41.71	0.95	43.4	3.1	150	150	41.71	0.95		3.89401
Zircon_169	278	174.3	0.626978		0.0646	0.0079	0.0572	0.0072	0.00641	0.00028	0.00238	0.00019	0.07884		41.2	1.8	56.3	6.9	700	260	41.2	1.8		26.8206	*
Zircon_170	470	260	0.553191		0.046	0.0037	0.0403	0.003	0.0063	0.00032	0.00211	0.00021	-0.32765		40.5	2.1	40.1	3	0	170	40.5	2.1		-0.997506
Zircon_171	784	576	0.734694		0.049	0.0049	0.0446	0.004	0.00666	0.00021	0.00228	0.00011	-0.19952		42.8	1.3	44.3	3.9	140	210	42.8	1.3		3.386
Zircon_172	1168	1038	0.888699		0.0495	0.0039	0.0443	0.0037	0.00642	0.00021	0.002148	9.5e-05	0.16631		41.3	1.3	44	3.6	190	180	41.3	1.3		6.13636
Zircon_173	231	146	0.632035		0.069	0.01	0.0608	0.008	0.0066	0.00032	0.00264	0.00029	-0.18546		42.4	2	59.7	7.6	780	330	42.4	2		28.9782	*
Zircon_174	870	789	0.906897		0.0522	0.0034	0.0456	0.0028	0.00637	0.00016	0.00209	0.00011	-0.10309		40.9	1.1	45.2	2.7	270	150	40.9	1.1		9.51327
Zircon_175	1500	1710	1.14		0.0508	0.003	0.0464	0.0025	0.00671	0.00018	0.002284	9.1e-05	0.024244		43.1	1.1	46.1	2.4	220	130	43.1	1.1		6.50759
Zircon_176	1171	1036	0.884714		0.0569	0.0041	0.0497	0.0036	0.00659	0.00019	0.00225	0.00012	0.055019		42.3	1.2	49.2	3.4	460	170	42.3	1.2		14.0244
Zircon_177	341	234	0.686217		0.0662	0.0087	0.0629	0.0082	0.00685	0.00026	0.00224	0.00021	-0.05472		44	1.6	61.7	7.8	670	270	44	1.6		28.6872
Zircon_178	772	602	0.779793		0.0483	0.0038	0.0431	0.003	0.00659	0.00018	0.00217	0.00011	-0.016507		42.3	1.1	42.8	3	120	170	42.3	1.1		1.16822
Zircon_179	353	229	0.648725		0.144	0.023	0.145	0.023	0.00722	0.00019	0.00416	0.00052	0.72847		46.4	1.2	137	20	2220	290	46.4	1.2		66.1314	*
Zircon_180	288	165	0.572917		0.0532	0.007	0.0487	0.0056	0.00652	0.00029	0.00225	0.0002	-0.11031		41.9	1.8	48.2	5.4	320	280	41.9	1.8		13.0705
Zircon_181	465	456	0.980645		0.0585	0.0049	0.0486	0.0037	0.00633	0.00022	0.00209	0.00011	0.1093		40.7	1.4	48.1	3.6	480	190	40.7	1.4		15.3846
Zircon_182	312	199	0.637821		0.0625	0.0063	0.0549	0.0057	0.00636	0.00027	0.00209	0.00015	0.18269		40.8	1.7	54.2	5.4	640	190	40.8	1.7		24.7232
Zircon_183	623	582	0.934189		0.0531	0.0046	0.0453	0.0035	0.00649	0.00022	0.00198	0.00012	0.26538		41.7	1.4	45	3.4	280	180	41.7	1.4		7.33333
Zircon_184	275	203	0.738182		0.144	0.012	0.143	0.01	0.00701	0.00033	0.00424	0.00035	0.19609		45	2.1	135.7	9.1	2260	150	45	2.1		66.8386	*
Zircon_185	2810	3610	1.2847		0.0475	0.0022	0.0448	0.0019	0.00683	0.00014	0.002166	7.6e-05	-0.077496		43.85	0.87	44.5	1.9	80	100	43.85	0.87		1.46067
Zircon_186	295	219	0.742373		0.089	0.01	0.0809	0.0086	0.00643	0.00028	0.00259	0.00019	0.073593		41.3	1.8	78.8	8.1	1380	230	41.3	1.8		47.5888	*
Zircon_187	361	249	0.689751		0.0536	0.0055	0.0482	0.0047	0.00637	0.00024	0.00237	0.0002	-0.15584		40.9	1.5	47.8	4.6	410	240	40.9	1.5		14.4351
Zircon_188	1108	844	0.761733		0.0502	0.004	0.0439	0.0029	0.00653	0.00019	0.00215	0.00011	-0.06743		41.9	1.2	43.6	2.8	190	180	41.9	1.2		3.89908
Zircon_189	324	235	0.725309		0.0755	0.0065	0.069	0.0057	0.00673	0.00043	0.00245	0.00021	0.28133		43.3	2.8	67.7	5.4	1040	170	43.3	2.8		36.0414	*
Zircon_190	309	200	0.647249		0.0741	0.0097	0.0644	0.0071	0.00632	0.00029	0.00269	0.00022	-0.17953		40.6	1.9	63.3	6.8	1070	250	40.6	1.9		35.861	*
Zircon_191	261	150.1	0.575096		0.0697	0.007	0.0623	0.0055	0.00663	0.00024	0.00284	0.00028	-0.086319		42.6	1.6	62.3	5	820	220	42.6	1.6		31.6212	*
Zircon_192	289	191	0.6609		0.0658	0.0068	0.0578	0.0056	0.00635	0.00024	0.00239	0.00023	-0.11064		40.8	1.6	57	5.4	810	230	40.8	1.6		28.4211
Zircon_193	636	363	0.570755		0.0551	0.0048	0.0461	0.004	0.00629	0.00019	0.00199	0.00012	0.25694		40.4	1.2	45.7	3.9	360	190	40.4	1.2		11.5974
Zircon_194	494	427	0.864372		0.0601	0.0053	0.0556	0.0047	0.00661	0.00019	0.00225	0.00015	0.18523		42.5	1.2	54.8	4.5	660	170	42.5	1.2		22.4453
Zircon_195	342	227	0.663743		0.0505	0.0053	0.044	0.0041	0.00653	0.00021	0.00214	0.00013	-0.15975		41.9	1.4	44.2	3.9	200	210	41.9	1.4		5.20362
CR046	Rhyiolitic dome; 6,275,061N - 348,121E
Zircon_101	87	36	0.413793		0.091	0.022	0.096	0.021	0.00727	0.00041	0.00384	0.00061	-0.15812		46.7	2.6	91	19	930	390	46.7	2.6		48.6813	*
Zircon_102	440	259	0.588636		0.0563	0.0084	0.0523	0.0072	0.00689	0.00023	0.00281	0.00021	0.03		44.3	1.5	51.5	6.9	320	270	44.3	1.5		13.9806
Zircon_103	830	737	0.887952		0.0468	0.0038	0.0411	0.0031	0.00632	0.0002	0.00212	0.00013	0.071339		40.6	1.3	40.8	3.1	20	160	40.6	1.3		0.490196
Zircon_104	295	133	0.450847		0.0466	0.0075	0.0463	0.0074	0.00689	0.00031	0.0026	0.0003	0.049083		44.3	2	45.6	7.1	30	300	44.3	2		2.85088
Zircon_105	369	232	0.628726		0.057	0.0071	0.0522	0.0066	0.00669	0.00031	0.00229	0.00019	0.048229		43	2	52.6	6.3	370	260	43	2		18.251
Zircon_106	653	644	0.986217		0.0768	0.0092	0.0696	0.009	0.00686	0.00019	0.00266	0.00021	0.071141		44.1	1.2	68	8.4	1000	220	44.1	1.2		35.1471
Zircon_107	208	130	0.625		0.119	0.012	0.1063	0.009	0.00657	0.0003	0.00389	0.00036	0.32295		42.2	1.9	102.2	8.3	1930	190	42.2	1.9		58.7084
Zircon_108	804	603	0.75		0.0669	0.0063	0.0593	0.0048	0.00674	0.00021	0.0025	0.00015	0.067806		43.3	1.3	58.4	4.6	760	180	43.3	1.3		25.8562
Zircon_109	750	670	0.893333		0.0496	0.0042	0.0434	0.0034	0.0064	0.00022	0.00205	0.00014	0.09825		41.1	1.4	43.1	3.3	160	180	41.1	1.4		4.64037
Zircon_110	1493	1772	1.18687		0.0487	0.0036	0.0421	0.003	0.00644	0.00018	0.002031	9.7e-05	0.23716		41.4	1.2	41.9	2.9	120	160	41.4	1.2		1.19332
Zircon_111	517	325	0.628627		0.0512	0.0059	0.0449	0.0047	0.00649	0.00022	0.00205	0.00016	0.080385		41.7	1.4	44.5	4.5	160	220	41.7	1.4		6.29213
Zircon_112	155	65	0.419355		0.084	0.071	0.08	0.19	0.0069	0.0016	0.0054	0.008	-0.11027		44	10	70	110	1030	560	44	10		37.1429	*
Zircon_113	491	270	0.549898		0.0487	0.0053	0.0413	0.0044	0.00631	0.00027	0.00226	0.00021	0.028572		40.5	1.7	41	4.2	90	220	40.5	1.7		1.21951	*
Zircon_114	1133	1131	0.998235		0.349	0.04	0.47	0.13	0.0096	0.0012	0.0097	0.0019	0.71703		61.4	7.3	393	71	3690	150	3690	150		84.3766
Zircon_115	749	609	0.813084		0.0502	0.0051	0.0451	0.0045	0.00652	0.00021	0.00212	0.00016	0.32722		41.9	1.4	44.7	4.4	130	210	41.9	1.4		6.26398
Zircon_116	2019	3731	1.84794		0.0477	0.0031	0.0422	0.0024	0.00654	0.00015	0.00151	0.00012	0.034		42.03	0.98	41.9	2.3	90	130	42.03	0.98		-0.310263
Zircon_117	1067	830	0.777882		0.0461	0.0045	0.0417	0.0035	0.00666	0.0002	0.00207	0.00012	0.031931		42.8	1.3	41.5	3.5	-20	190	42.8	1.3		-3.13253
Zircon_118	288	208	0.722222		0.0466	0.0068	0.0415	0.0062	0.00645	0.00032	0.00221	0.00021	0.17672		41.4	2.1	41.1	6	110	250	41.4	2.1		-0.729927
Zircon_119	232	206	0.887931		0.093	0.082	0.1	0.46	0.0073	0.004	0.0038	0.008	0.010109		47	25	90	190	1290	540	47	25		47.7778	*
Zircon_120	319	193	0.605016		0.0489	0.007	0.0421	0.0054	0.00686	0.00028	0.00214	0.0002	0.080743		44.1	1.8	41.8	5.2	70	280	44.1	1.8		-5.50239	*
Zircon_121	1147	946	0.82476		0.0506	0.0037	0.0452	0.0032	0.00657	0.00019	0.00215	0.00011	0.032		42.2	1.2	44.8	3.2	180	160	42.2	1.2		5.80357
Zircon_122	941	790	0.839532		0.0473	0.0044	0.0407	0.0032	0.00644	0.0002	0.00187	0.00011	0.01		41.4	1.3	40.4	3.2	50	180	41.4	1.3		-2.47525
Zircon_123	300	128	0.426667		0.056	0.01	0.048	0.009	0.00663	0.00033	0.00256	0.00038	0.054		42.6	2.1	47.3	8.6	310	340	42.6	2.1		9.93658
Zircon_124	623	462	0.741573		0.0451	0.0049	0.0414	0.0039	0.00664	0.00019	0.00204	0.00013	0.04		42.7	1.2	41.1	3.8	0	200	42.7	1.2		-3.89294
Zircon_125	629	354	0.562798		0.0495	0.0054	0.0463	0.0049	0.00684	0.00021	0.00222	0.00016	0.01		44	1.3	45.9	4.7	160	210	44	1.3		4.13943
Zircon_126	783	591	0.754789		0.0502	0.0093	0.0424	0.0087	0.00633	0.00025	0.00198	0.00025	0.0221		40.7	1.6	42.1	8.2	160	260	40.7	1.6		3.32542
Zircon_127	485	332	0.684536		0.0518	0.0065	0.0494	0.0056	0.00673	0.00022	0.00218	0.00018	0.02		43.3	1.4	48.8	5.4	310	240	43.3	1.4		11.2705
Zircon_128	415	287	0.691566		0.0525	0.0054	0.0469	0.0053	0.00666	0.00024	0.00237	0.0002	0.18552		42.8	1.5	46.5	5.1	220	210	42.8	1.5		7.95699
Zircon_129	436	238	0.545872		0.0533	0.0084	0.0478	0.007	0.00664	0.00023	0.00227	0.00022	0.023		42.6	1.5	47.2	6.7	230	290	42.6	1.5		9.74576
Zircon_130	649	500	0.770416		0.0472	0.0052	0.0432	0.0043	0.00655	0.00022	0.00203	0.00012	0.068219		42.1	1.4	42.9	4.2	50	200	42.1	1.4		1.8648
Zircon_131	704	584	0.829545		0.0618	0.0067	0.0597	0.006	0.007	0.00019	0.0025	0.00016	0.053433		45	1.2	58.6	5.8	600	210	45	1.2		23.2082
Zircon_132	619	520	0.840065		0.0477	0.0048	0.0438	0.0041	0.00671	0.00024	0.00206	0.00017	0.021		43.1	1.5	43.4	4	70	210	43.1	1.5		0.691244
Zircon_133	434	327	0.753456		0.163	0.051	0.16	0.13	0.0071	0.0012	0.0049	0.0015	0.17032		45.5	7.4	147	85	2520	250	45.5	7.4		69.0476	*
Zircon_134	364	224	0.615385		0.0525	0.0065	0.0468	0.0059	0.00648	0.00029	0.00267	0.00024	0.079773		41.6	1.9	46.3	5.7	270	230	41.6	1.9		10.1512
Zircon_135	512	428	0.835938		0.057	0.0059	0.0557	0.0054	0.00693	0.00026	0.00232	0.00018	0.3039		44.5	1.6	54.9	5.1	480	210	44.5	1.6		18.9435
CR052	Rhyiolitic dome; 6,270,338N - 345,382E
Zircon_01	434	383	0.882488		0.0493	0.0055	0.045	0.0047	0.00641	0.00021	0.00211	0.00017	0.10353		41.2	1.4	44.6	4.7	230	200	41.2	1.4		7.62332
Zircon_02	198.9	118	0.593263		0.0531	0.0028	0.33	0.021	0.0455	0.0011	0.0137	0.0008	0.035258		286.8	6.9	291	16	302	120	286.8	6.9		1.4433	*
Zircon_03	1230	1434	1.16585		0.0588	0.0049	0.0531	0.0054	0.00639	0.00019	0.002126	0.00015	0.02		41.1	1.2	52.5	5.2	580	140	41.1	1.2		21.7143
Zircon_05	132.4	75.41	0.569562		0.063	0.012	0.055	0.0098	0.00658	0.0003	0.00222	0.00032	0.02		42.3	1.9	54	9.4	420	350	42.3	1.9		21.6667
Zircon_06	1100	665	0.604545		0.0474	0.0028	0.0874	0.0068	0.01334	0.00028	0.00421	0.0003	0.28514		85.4	1.8	85	6.3	66	120	85.4	1.8		-0.470588	*
Zircon_07	182.5	136.9	0.750137		0.054	0.011	0.051	0.009	0.00653	0.00029	0.00215	0.00022	0.02		42	1.9	50	8.6	200	340	42	1.9		16
Zircon_08	142.3	77.13	0.542024		0.063	0.01	0.054	0.0083	0.00683	0.00035	0.00282	0.0003	0.02		43.9	2.3	53	7.9	490	290	43.9	2.3		17.1698
Zircon_09	194.2	149.4	0.76931		0.0548	0.0095	0.0481	0.0083	0.00669	0.00028	0.00237	0.00023	0.015997		43	1.8	47.4	8.2	280	300	43	1.8		9.2827
Zircon_10	1830	3100	1.69399		0.0481	0.0026	0.044	0.0029	0.00674	0.00013	0.002255	0.00011	0.18172		43.29	0.83	43.7	2.8	90	110	43.29	0.83		0.938215
Zircon_11	251.6	257	1.02146		0.0522	0.0068	0.0444	0.0062	0.00641	0.00023	0.00202	0.00017	0.13515		41.2	1.5	44	6	240	240	41.2	1.5		6.36364
Zircon_13	142.8	94.9	0.664566		0.073	0.019	0.066	0.025	0.00738	0.00039	0.00308	0.00075	0.15056		47.4	2.5	65	23	880	340	47.4	2.5		27.0769	*
Zircon_14	600	830	1.38333		0.0503	0.0044	0.0476	0.0049	0.0067	0.00022	0.0021	0.00014	0.34385		43	1.4	47.1	4.7	330	190	43	1.4		8.70488
Zircon_16	241	225	0.93361		0.059	0.0078	0.0518	0.007	0.00663	0.00027	0.00235	0.00022	0.02		42.6	1.7	51.1	6.6	380	270	42.6	1.7		16.6341
Zircon_17	965	1426	1.47772		0.0482	0.0035	0.0427	0.0034	0.00652	0.00017	0.002074	0.00012	0.02		41.92	1.1	42.4	3.3	80	150	41.92	1.1		1.13208
Zircon_18	247	283	1.14575		0.0709	0.008	0.0639	0.0076	0.00697	0.0003	0.00248	0.00023	0.02		44.7	1.9	62.7	7.4	940	240	44.7	1.9		28.7081	*
Zircon_20	121.1	76.4	0.630884		0.056	0.011	0.056	0.011	0.00707	0.00032	0.00261	0.00031	0.02		45.4	2.1	55	10	320	370	45.4	2.1		17.4545
Zircon_21	132.3	77.4	0.585034		0.0547	0.0091	0.0498	0.0095	0.00617	0.00029	0.00247	0.00041	0.38931		39.7	1.8	50.4	9	460	290	39.7	1.8		21.2302
Zircon_22	281.7	240.5	0.853745		0.047	0.0055	0.0415	0.0054	0.00653	0.00027	0.00215	0.00019	0.23428		42	1.7	41.2	5.3	100	230	42	1.7		-1.94175
Zircon_24	641	934	1.4571		0.0565	0.0056	0.0502	0.0052	0.00657	0.00019	0.00207	0.00013	0.02		42.2	1.2	49.6	5	440	190	42.2	1.2		14.9194
Zircon_25	3041	7710	2.53535		0.0484	0.0019	0.0426	0.0025	0.00641	0.00011	0.002107	0.0001	0.02		41.22	0.72	42.4	2.4	110	88	41.22	0.72		2.78302
Zircon_27	420	418	0.995238		0.054	0.0071	0.048	0.0065	0.00631	0.00023	0.0022	0.0002	0.046926		40.5	1.5	48	6.2	250	230	40.5	1.5		15.625
Zircon_29	120	88.2	0.735		0.056	0.0094	0.0486	0.0075	0.00671	0.00036	0.00259	0.00032	0.02		43.1	2.3	48	7.2	200	290	43.1	2.3		10.2083
Zircon_30	404	384	0.950495		0.0555	0.0058	0.0497	0.0055	0.00655	0.00022	0.00218	0.00018	0.22683		42.1	1.4	49.1	5.3	360	210	42.1	1.4		14.2566
Zircon_31	264	238	0.901515		0.0555	0.0067	0.0518	0.0061	0.00676	0.00025	0.00233	0.00021	0.02		43.4	1.6	51.2	5.9	360	220	43.4	1.6		15.2344
Zircon_32	300	305	1.01667		0.0467	0.006	0.0428	0.0059	0.00671	0.00025	0.00221	0.00015	0.02		43.1	1.6	42.4	5.7	10	250	43.1	1.6		-1.65094
Zircon_33	991	1401	1.41372		0.064	0.005	0.0569	0.0049	0.00643	0.00014	0.002154	0.00012	0.02		41.34	0.89	56.2	4.6	710	140	41.34	0.89		26.4413	*
Zircon_35	111.2	54.57	0.490737		0.058	0.013	0.058	0.012	0.00679	0.00031	0.00266	0.0004	0.28902		43.6	2	57	12	350	370	43.6	2		23.5088
CB1	Hornblende granodiorite; 6,398,937N - 344,162E
Zircon_01	132.5	146.9	1.10868		0.0518	0.0067	0.081	0.01	0.01144	0.00056	0.00389	0.00031	0.01044		73.3	3.6	78.7	9.5	250	270	73.3	3.6		6.8615
Zircon_02	264	135	0.511364		0.224	0.023	0.421	0.042	0.01346	0.00066	0.0175	0.0016	0.33083		86.2	4.2	355	30	3030	170	3030	4.2		75.7183	*
Zircon_03	265	243	0.916981		0.0513	0.0063	0.081	0.01	0.01127	0.00046	0.00409	0.00029	0.080781		73.3	2.9	78.3	9.3	260	250	73.3	2.9		6.3857
Zircon_04	1820	1280	0.703297		0.0754	0.0043	0.111	0.0058	0.01069	0.00018	0.00413	0.00021	-0.11967		68.6	1.2	106.8	5.3	1090	100	68.6	1.2		35.7678	*
Zircon_05	234	153	0.653846		0.099	0.015	0.143	0.021	0.0103	0.00039	0.00518	0.00053	-0.21757		66.1	2.5	135	18	1600	310	66.1	2.5		51.037	*
Zircon_06	266	136	0.511278		0.0528	0.0071	0.077	0.01	0.01071	0.00036	0.00389	0.0005	-0.044798		68.7	2.3	75.3	9.6	280	290	68.7	2.3		8.76494
Zircon_07	391	286	0.731458		0.0614	0.0069	0.0896	0.0092	0.01074	0.00031	0.00394	0.00029	-0.01693		68.9	2	86.9	8.6	610	250	68.9	2		20.7135
Zircon_09	192	135.2	0.704167		0.0605	0.0069	0.095	0.011	0.01145	0.00059	0.00398	0.00032	0.10699		73.4	3.8	91.5	9.9	560	250	73.4	3.8		19.7814
Zircon_10	283	166	0.586572		0.058	0.012	0.087	0.017	0.0111	0.00041	0.00503	0.00048	-0.052873		71.1	2.6	89	18	480	400	71.1	2.6		20.1124
Zircon_11	264	174	0.659091		0.0517	0.0047	0.074	0.0059	0.0109	0.0003	0.00359	0.00025	0.08386		69.9	1.9	72.4	5.6	210	190	69.9	1.9		3.45304
Zircon_12	156.2	86.4	0.553137		0.082	0.012	0.118	0.017	0.01075	0.00059	0.00482	0.00047	0.073217		68.9	3.8	116	14	1180	270	68.9	3.8		40.6034	*
Zircon_13	300	189	0.63		0.0899	0.0099	0.121	0.012	0.0099	0.00036	0.00508	0.00041	0.023693		63.5	2.3	117	11	1410	220	63.5	2.3		45.7265	*
Zircon_14	197	103	0.522843		0.0627	0.0078	0.0923	0.0088	0.01105	0.00061	0.00454	0.00037	-0.38725		70.8	3.9	89.5	8.2	700	280	70.8	3.9		20.8939
Zircon_15	183	144	0.786885		0.168	0.015	0.281	0.026	0.01158	0.00063	0.00808	0.00059	0.45702		74.2	4	250	21	2550	150	74.2	4		70.32	*
Zircon_16	264	201	0.761364		0.0599	0.0062	0.094	0.011	0.01158	0.00037	0.00418	0.00037	0.39648		74.2	2.4	94	11	600	250	74.2	2.4		21.0638	*
Zircon_17	709	193	0.272214		0.1008	0.009	0.138	0.014	0.00999	0.00041	0.0073	0.0011	0.57036		64.1	2.6	131	13	1680	160	64.1	2.6		51.0687	*
Zircon_18	212	133.1	0.62783		0.0502	0.0051	0.0747	0.0076	0.01092	0.00041	0.00359	0.00037	-0.039537		70	2.6	72.9	7.2	190	200	70	2.6		3.97805
Zircon_19	278	118	0.42446		0.112	0.018	0.156	0.019	0.01032	0.00063	0.00873	0.0009	0.12907		66.2	4	147	16	1820	300	66.2	4		54.966	*
Zircon_20	1670	2930	1.75449		0.0596	0.0041	0.0943	0.0055	0.0112	0.00034	0.0028	0.0013	0.3108		71.8	2.2	91.5	5.1	640	150	71.8	2.2		21.5301
Zircon_21	337	268	0.795252		0.0488	0.0041	0.0733	0.0057	0.01063	0.00025	0.00338	0.00016	-0.20701		68.2	1.6	71.6	5.4	170	180	68.2	1.6		4.7486
Zircon_22	274	344	1.25547		0.0518	0.0054	0.0762	0.0079	0.01064	0.00035	0.00363	0.0002	0.14862		68.2	2.3	74.3	7.4	280	220	68.2	2.3		8.20996
Zircon_24	396	184	0.464646		0.0784	0.0082	0.116	0.012	0.01042	0.00055	0.00482	0.00041	0.14212		66.8	3.5	111	11	1110	200	66.8	3.5		39.8198	*
Zircon_25	300	285	0.95		0.133	0.019	0.173	0.023	0.00923	0.00059	0.00495	0.00044	-0.020924		59.2	3.8	161	20	2190	240	59.2	3.8		63.2298	*
CB3	Hornblende quartzmonzonite; 6,422,776N - 340,112E
Zircon_26	334	449	1.34431		0.0466	0.0049	0.058	0.0055	0.00897	0.00026	0.00286	0.00014	0.053355		57.5	1.7	57	5.2	20	200	57.5	1.7		-0.877193
Zircon_27	51.4	37.7	0.733463		0.052	0.018	0.065	0.02	0.00887	0.00087	0.00441	0.0006	0.092887		56.9	5.5	63	19	140	640	56.9	5.5		9.68254
Zircon_28	97.7	87.6	0.896622		0.056	0.011	0.065	0.012	0.00888	0.00048	0.00297	0.00026	0.14095		57	3	63	12	180	360	57	3		9.52381
Zircon_29	60.2	28.4	0.471761		0.056	0.016	0.057	0.016	0.00843	0.00099	0.00402	0.00077	0.41159		54.1	6.3	56	15	240	550	54.1	6.3		3.39286
Zircon_30	194.4	210.7	1.08385		0.0489	0.0057	0.0586	0.0062	0.00884	0.00033	0.00285	0.00021	0.0192		56.8	2.1	57.7	6	170	230	56.8	2.1		1.55979
Zircon_31	46.1	28.6	0.62039		0.062	0.018	0.072	0.02	0.00912	0.00071	0.00396	0.00075	0.16631		58.5	4.6	69	19	350	550	58.5	4.6		15.2174
Zircon_32	99.9	82.8	0.828829		0.0494	0.0089	0.06	0.011	0.00881	0.00035	0.00276	0.00033	0.055881		56.5	2.3	58	11	50	350	56.5	2.3		2.58621
Zircon_33	120.7	79.2	0.656172		0.0494	0.0068	0.0586	0.0076	0.00876	0.00041	0.0028	0.0003	0.0083291		56.2	2.6	57.5	7.3	90	260	56.2	2.6		2.26087
Zircon_34	174	157	0.902299		0.0624	0.0083	0.0768	0.0087	0.00907	0.00046	0.00345	0.00025	0.0732		58.2	2.9	74.9	8.2	630	280	58.2	2.9		22.2964
Zircon_35	45.5	31.1	0.683516		0.139	0.033	0.18	0.042	0.00967	0.00093	0.0064	0.001	0.094046		62	6	163	35	1900	500	62	6		61.9632	*
Zircon_36	82.9	58.2	0.702051		0.112	0.025	0.11	0.018	0.00836	0.00068	0.00392	0.00054	-0.32941		53.7	4.3	105	16	1550	450	53.7	4.3		48.8571	*
Zircon_37	78	69	0.884615		0.063	0.02	0.099	0.03	0.01019	0.00084	0.00481	0.00086	0.18849		65.3	5.4	98	28	370	610	65.3	5.4		33.3673	*
Zircon_38	60.5	30.7	0.507438		0.057	0.013	0.07	0.016	0.00929	0.00065	0.00401	0.00077	0.06382		59.6	4.1	71	15	270	450	59.6	4.1		16.0563
Zircon_39	141.4	109	0.770863		0.055	0.01	0.066	0.011	0.00862	0.00043	0.00312	0.00028	0.06321		55.3	2.7	64	11	350	390	55.3	2.7		13.5938
Zircon_40	52.9	24.6	0.465028		0.057	0.013	0.069	0.015	0.00878	0.00077	0.00367	0.00069	0.0692		56.3	4.9	69	15	360	480	56.3	4.9		18.4058
Zircon_41	56.5	29.1	0.515044		0.049	0.012	0.065	0.015	0.00887	0.00067	0.00357	0.00072	0.10468		56.9	4.3	63	14	-120	440	56.9	4.3		9.68254
Zircon_42	212	236	1.11321		0.0488	0.0061	0.0594	0.0074	0.00867	0.00036	0.00297	0.00018	0.24208		55.6	2.3	59.4	6.9	190	250	55.6	2.3		6.39731
Zircon_43	33.8	17.08	0.505325		0.127	0.03	0.145	0.031	0.0093	0.0011	0.0065	0.0015	0.34391		59.6	6.8	135	27	1920	410	59.6	6.8		55.8519	*
Zircon_44	63.6	30.4	0.477987		0.057	0.013	0.072	0.017	0.00928	0.00066	0.00405	0.00067	0.04578		59.5	4.2	69	16	250	480	59.5	4.2		13.7681
Zircon_45	63.8	35.9	0.562696		0.086	0.026	0.096	0.028	0.00864	0.00073	0.0048	0.001	0.16575		55.4	4.6	91	25	750	610	55.4	4.6		39.1209	*
Zircon_46	60.4	35.8	0.592715		0.07	0.02	0.08	0.023	0.00889	0.00076	0.00383	0.00074	-0.11988		57.1	4.8	77	21	420	570	57.1	4.8		25.8442	*
Zircon_47	167	155	0.928144		0.059	0.014	0.064	0.014	0.00809	0.00042	0.00287	0.00039	0.01732		52	2.7	62	13	390	490	52	2.7		16.129
Zircon_48	111.9	85.1	0.7605		0.08	0.016	0.097	0.02	0.00854	0.00054	0.00421	0.00056	0.19407		54.8	3.5	93	18	1060	390	54.8	3.5		41.0753	*
Zircon_49	135	123	0.911111		0.051	0.012	0.06	0.014	0.009	0.00094	0.00295	0.00059	0.0612		57.8	6	59	14	350	480	57.8	6		2.0339
Zircon_50	44.9	25.9	0.576837		0.122	0.029	0.14	0.031	0.0084	0.001	0.00512	0.00088	0.05322		53.8	6.5	130	28	1920	450	53.8	6.5		58.6154	*
Zircon_51	39.7	24.6	0.619647		0.094	0.02	0.122	0.023	0.00928	0.00073	0.00518	0.00069	0.03081		59.5	4.7	115	21	1360	410	59.5	4.7		48.2609	*
Zircon_52	154	64.3	0.417532		0.057	0.011	0.059	0.011	0.00833	0.00057	0.00377	0.0006	0.0123		53.5	3.7	61	11	450	390	53.5	3.7		12.2951
Zircon_53	29.9	14.7	0.491639		0.064	0.021	0.065	0.021	0.0088	0.00085	0.00368	0.00081	0.14791		56.5	5.5	73	24	300	630	56.5	5.5		22.6027
Zircon_54	36.7	21.5	0.585831		0.06	0.022	0.073	0.027	0.00873	0.00092	0.00242	0.00076	0.1503		56	5.9	70	25	290	710	56	5.9		20
Zircon_55	37.3	21.2	0.568365		0.085	0.022	0.097	0.028	0.00949	0.00099	0.0051	0.0011	0.14948		60.9	6.3	96	27	760	640	60.9	6.3		36.5625	*
Zircon_56	38	20.7	0.544737		0.089	0.023	0.103	0.024	0.00865	0.00099	0.0049	0.0011	-0.1108		55.5	6.3	99	22	1450	490	55.5	6.3		43.9394	*
Zircon_57	125.2	85.5	0.682907		0.05	0.011	0.066	0.015	0.00973	0.00051	0.00336	0.00045	0.08311		62.4	3.2	64	14	30	440	62.4	3.2		2.5
Zircon_58	62.5	32.4	0.5184		0.083	0.014	0.102	0.016	0.0084	0.00061	0.00548	0.00063	0.087953		53.9	3.9	100	15	1270	370	53.9	3.9		46.1	*
Zircon_59	34.9	19.8	0.567335		0.059	0.03	0.086	0.039	0.0091	0.0012	0.0049	0.0013	0.14746		58.4	7.4	81	36	30	950	58.4	7.4		27.9012	*
Zircon_60	54.8	29.8	0.543796		0.05	0.011	0.058	0.012	0.0093	0.00067	0.00322	0.00058	0.12179		59.6	4.3	56	12	-20	400	59.6	4.3		-6.42857	*
Notes:
(1) Data not used in the age calculation.

## Sheet: Item4
Item 4: U-Pb age determinations in primary igneous zircons of samples from the latest Cretaceous-Paleocene units.
Notes: Tera-Wasserburg plots and corresponding frequency histograms (light blue boxes) and relative probability density plots are displayed. Error ellipses are indicated at 2σ level and weighted average ages are indicated as inset. In all diagrams only data considered for age calculations has been ploted.
